# Supplementary material for: Discovery and validation of metabolite markers in bloodstains for bloodstain age estimation
Source: Royal Society of Chemistry journal article supplement (doi:10.1039/d3an00603d), 2023-01-01
Supplement: d3an00603d1.pdf [file d3an00603d1.pdf]

## Supplemental figures

### Discovery and validation of metabolite markers in bloodstain for bloodstain age estimation

Seungyeon Lee<sup>a</sup>, You-Rim Lee<sup>a</sup>, Jiyeong Lee<sup>\*b</sup>, Hee-Gyoo Kang<sup>\*a,c</sup>

<sup>a</sup>Department of Senior Healthcare, Graduate School, Eulji University, Uijeongbu, Republic of Korea

<sup>b</sup>Department of Biomedical Laboratory Science, College of Health Science, Eulji University, Uijeongbu, Republic of Korea

<sup>c</sup>Department of Biomedical Laboratory Science, College of Health Sciences, Eulji University, Seongnam, Republic of Korea

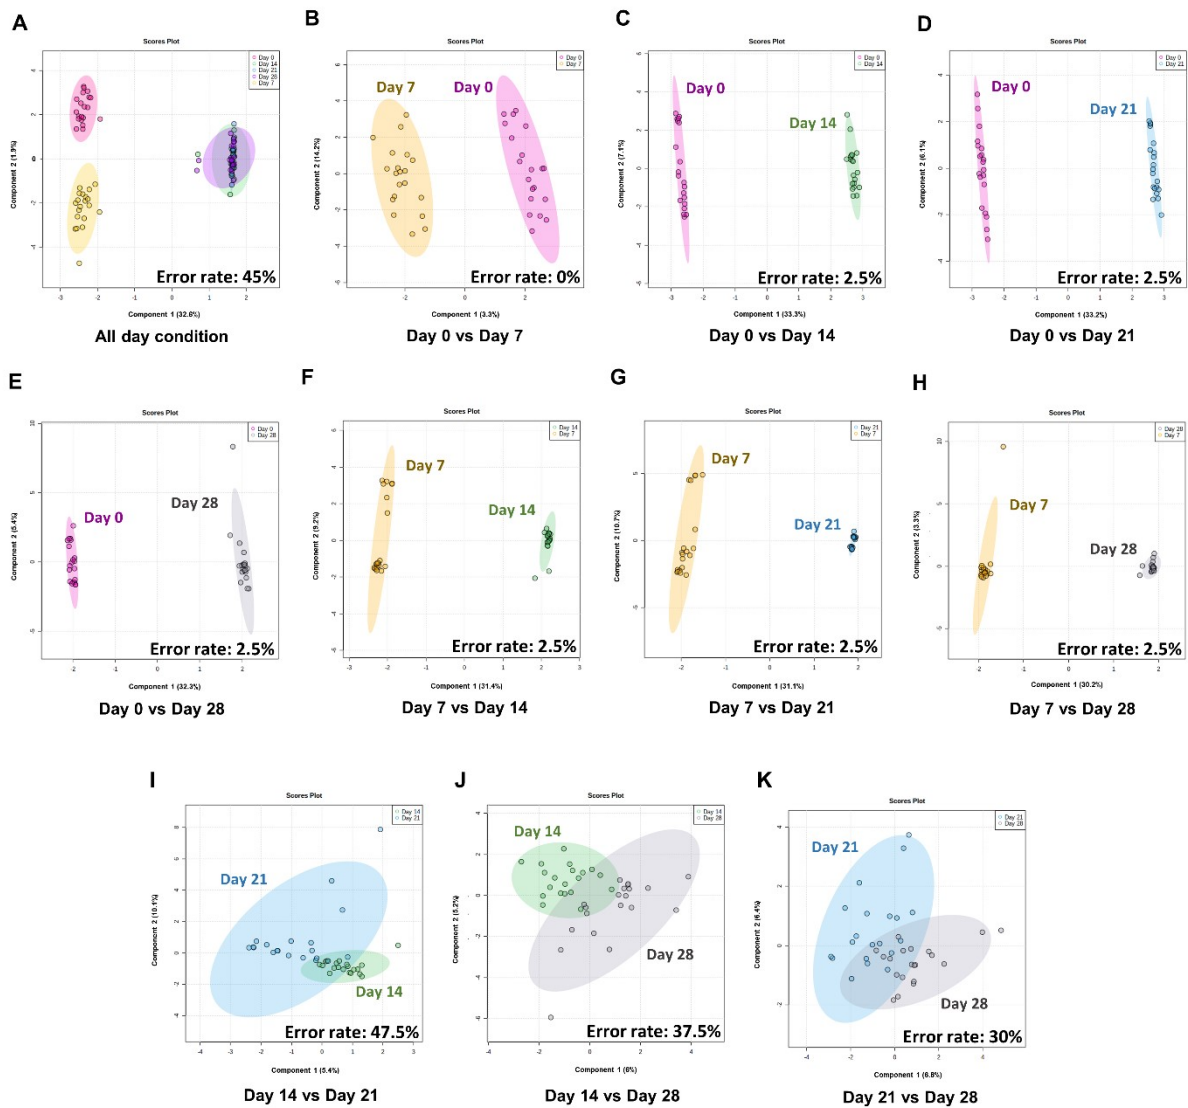

**Figure S1.** sPLS-DA score plot of each day comparison. (A) is a score plot showing all day conditions. (B)-(E) are comparative combinations of day 0 and days 7, 14, 21, and 28, (F)-(H) are comparative combinations of day 7 and days 14, 21, and 28. (I) and (J) are comparative combinations of day 14 and days 21, and 28. (K) is comparative combinations of day 21 and days 28.
