# Supplementary material for: Discovery and validation of metabolite markers in bloodstains for bloodstain age estimation
Source: Royal Society of Chemistry journal article supplement (doi:10.1039/d3an00603d), 2023-01-01
Supplement: d3an00603d2.pdf [file d3an00603d2.pdf]

## Supplemental tables

### Discovery and validation of metabolite markers in bloodstain for bloodstain age estimation

Seungyeon Lee<sup>a</sup>, You-Rim Lee<sup>a</sup>, Jiyeong Lee<sup>\*b</sup>, Hee-Gyoo Kang<sup>\*a,c</sup>

<sup>a</sup>Department of Senior Healthcare, Graduate School, Eulji University, Uijeongbu, Republic of Korea

<sup>b</sup>Department of Biomedical Laboratory Science, College of Health Science, Eulji University, Uijeongbu, Republic of Korea

<sup>c</sup>Department of Biomedical Laboratory Science, College of Health Sciences, Eulji University, Seongnam, Republic of Korea

**Table S1.** Demographic information of subjects

| Experiment set                      | Discovery set<br>(n=20)                      | Validation set<br>(n=40)                      |
|-------------------------------------|----------------------------------------------|-----------------------------------------------|
| Age (mean $\pm$ standard deviation) | Young: 24 $\pm$ 3<br>The elderly: 68 $\pm$ 9 | Young: 24 $\pm$ 2<br>The elderly: 68 $\pm$ 10 |
| Sex (male/female)                   | 10/10                                        | 16/24                                         |
| Disease                             | 4                                            | 12                                            |
| Smoking                             | 1                                            | 3                                             |
| > 8 hours fasting                   |                                              | yes                                           |

**Table S2.** MRM transition parameters

| Analyte                         | Q1      | Q3    | DP  | EP | CE | CXP |
|---------------------------------|---------|-------|-----|----|----|-----|
| Adenosine 5'-monophosphate      | 347.992 | 136.1 | 111 | 10 | 27 | 20  |
|                                 | 347.992 | 119.2 | 111 | 10 | 77 | 10  |
| Adenosine 5'-monophosphate 15N5 | 352.952 | 141.1 | 116 | 10 | 25 | 8   |
|                                 | 352.952 | 123.1 | 116 | 10 | 79 | 8   |
| Choline                         | 104.957 | 45    | 86  | 10 | 31 | 6   |
|                                 | 104.957 | 59.3  | 86  | 10 | 37 | 22  |
| Choline d4                      | 109.07  | 61.1  | 116 | 10 | 25 | 8   |
|                                 | 109.07  | 59.1  | 116 | 10 | 35 | 6   |
| Ergothioneine                   | 229.969 | 186.1 | 46  | 10 | 17 | 12  |
|                                 | 230.066 | 127.1 | 206 | 10 | 25 | 12  |
| Ergothioneine d9                | 239.124 | 127.1 | 106 | 10 | 27 | 10  |
|                                 | 239.124 | 195.2 | 106 | 10 | 17 | 12  |
| Hypoxanthine                    | 136.909 | 119.1 | 106 | 10 | 29 | 8   |
|                                 | 136.909 | 110.1 | 106 | 10 | 29 | 8   |
| Hypoxanthine 13C2 15N           | 139.974 | 113.1 | 136 | 10 | 29 | 8   |
|                                 | 139.974 | 122.1 | 136 | 10 | 29 | 10  |
| L-Isoleucine                    | 131.999 | 86.1  | 26  | 10 | 15 | 10  |
|                                 | 131.991 | 69    | 51  | 10 | 23 | 10  |
| L-Isoleucine d10                | 142.04  | 96.2  | 111 | 10 | 15 | 8   |
|                                 | 142.04  | 78.1  | 111 | 10 | 25 | 10  |
| L-Tryptophan                    | 204.989 | 146.1 | 46  | 10 | 23 | 10  |
|                                 | 204.989 | 118.1 | 46  | 10 | 35 | 6   |
| L-Tryptophan d5                 | 210.09  | 192.1 | 111 | 10 | 15 | 12  |
|                                 | 210.09  | 150.1 | 111 | 10 | 25 | 10  |
| Pyroglutamic acid               | 129.965 | 84    | 76  | 10 | 23 | 34  |
|                                 | 129.965 | 56.1  | 76  | 10 | 31 | 8   |

**Table S3.** MFs list integrated from volcano plot analysis and sPLS-DA loading components

| No. | Molecular feature |                   | Day 0<br>vs<br>Day 7 | Day 0<br>vs<br>Day 14 | Day 0<br>vs<br>Day 21 | Day 0<br>vs<br>Day 28 | Day 7<br>vs<br>Day 14 | Day 7<br>vs<br>Day 21 | Day 7<br>vs<br>Day 28 |
|-----|-------------------|-------------------|----------------------|-----------------------|-----------------------|-----------------------|-----------------------|-----------------------|-----------------------|
|     | Mass              | Retention<br>time |                      |                       |                       |                       |                       |                       |                       |
| 1   | 382.1088          | 0.66              |                      |                       |                       |                       |                       |                       |                       |
| 2   | 165.0459          | 0.66              |                      |                       |                       |                       |                       |                       |                       |
| 3   | 455.2362          | 7.72              |                      |                       |                       |                       |                       |                       |                       |
| 4   | 513.3877          | 15.43             |                      |                       |                       |                       |                       |                       |                       |
| 5   | 557.4137          | 15.48             |                      |                       |                       |                       |                       |                       |                       |
| 6   | 264.0158          | 0.65              |                      |                       |                       |                       |                       |                       |                       |
| 7   | 761.5489          | 17.04             |                      |                       |                       |                       |                       |                       |                       |
| 8   | 619.8613          | 10.52             |                      |                       |                       |                       |                       |                       |                       |
| 9   | 511.9784          | 10.61             |                      |                       |                       |                       |                       |                       |                       |
| 10  | 185.178           | 13.14             |                      |                       |                       |                       |                       |                       |                       |
| 11  | 805.5756          | 17.04             |                      |                       |                       |                       |                       |                       |                       |
| 12  | 603.8296          | 11.91             |                      |                       |                       |                       |                       |                       |                       |
| 13  | 777.5451          | 15.66             |                      |                       |                       |                       |                       |                       |                       |
| 14  | 254.1397          | 0.63              |                      |                       |                       |                       |                       |                       |                       |
| 16  | 131.0134          | 4.07              |                      |                       |                       |                       |                       |                       |                       |
| 17  | 676.885           | 10.87             |                      |                       |                       |                       |                       |                       |                       |
| 18  | 596.8219          | 11.18             |                      |                       |                       |                       |                       |                       |                       |
| 19  | 586.3307          | 10.65             |                      |                       |                       |                       |                       |                       |                       |
| 20  | 583.8509          | 10.65             |                      |                       |                       |                       |                       |                       |                       |
| 21  | 433.1242          | 16.94             |                      |                       |                       |                       |                       |                       |                       |
| 22  | 199.0417          | 16.80             |                      |                       |                       |                       |                       |                       |                       |
| 23  | 603.8273          | 5.52              |                      |                       |                       |                       |                       |                       |                       |
| 24  | 459.1291          | 16.27             |                      |                       |                       |                       |                       |                       |                       |
| 25  | 746.4115          | 7.09              |                      |                       |                       |                       |                       |                       |                       |
| 26  | 321.1145          | 1.36              |                      |                       |                       |                       |                       |                       |                       |
| 27  | 468.9993          | 14.28             |                      |                       |                       |                       |                       |                       |                       |
| 28  | 428.0938          | 16.48             |                      |                       |                       |                       |                       |                       |                       |
| 29  | 460.1197          | 17.04             |                      |                       |                       |                       |                       |                       |                       |
| 31  | 518.1693          | 18.20             |                      |                       |                       |                       |                       |                       |                       |
| 32  | 520.7913          | 5.47              |                      |                       |                       |                       |                       |                       |                       |
| 33  | 514.0979          | 16.74             |                      |                       |                       |                       |                       |                       |                       |
| 34  | 573.0619          | 16.94             |                      |                       |                       |                       |                       |                       |                       |
| 35  | 244.0161          | 16.94             |                      |                       |                       |                       |                       |                       |                       |
| 36  | 545.8156          | 0.59              |                      |                       |                       |                       |                       |                       |                       |
| 37  | 285.2668          | 17.46             |                      |                       |                       |                       |                       |                       |                       |
| 38  | 737.8846          | 12.43             |                      |                       |                       |                       |                       |                       |                       |
| 39  | 544.8169          | 10.86             |                      |                       |                       |                       |                       |                       |                       |
| 40  | 113.0841          | 2.61              |                      |                       |                       |                       |                       |                       |                       |
| 41  | 103.0997          | 0.63              |                      |                       |                       |                       |                       |                       |                       |
| 42  | 306.076           | 0.81              |                      |                       |                       |                       |                       |                       |                       |
| 43  | 129.0426          | 0.96              |                      |                       |                       |                       |                       |                       |                       |
| 44  | 202.0453          | 0.66              |                      |                       |                       |                       |                       |                       |                       |
| 46  | 730.3702          | 13.20             |                      |                       |                       |                       |                       |                       |                       |
| 47  | 884.5306          | 19.03             |                      |                       |                       |                       |                       |                       |                       |
| 48  | 526.6535          | 10.63             |                      |                       |                       |                       |                       |                       |                       |
| 49  | 164.1049          | 2.08              |                      |                       |                       |                       |                       |                       |                       |
| 50  | 347.0631          | 0.80              |                      |                       |                       |                       |                       |                       |                       |
| 51  | 254.2121          | 9.80              |                      |                       |                       |                       |                       |                       |                       |
| 52  | 669.4298          | 15.66             |                      |                       |                       |                       |                       |                       |                       |
| 53  | 625.476           | 13.41             |                      |                       |                       |                       |                       |                       |                       |
| 54  | 266.1729          | 7.20              |                      |                       |                       |                       |                       |                       |                       |
| 55  | 370.2203          | 6.65              |                      |                       |                       |                       |                       |                       |                       |
| 56  | 217.1314          | 1.02              |                      |                       |                       |                       |                       |                       |                       |
| 57  | 529.8413          | 0.59              |                      |                       |                       |                       |                       |                       |                       |

Red shades indicate up fold-change, and blue shades indicate down fold-change.

**Table S4.** Statistical analysis to compare metabolite levels on each day

| Day combination   | 5'-AMP | Choline | Pyroglutamic acid |
|-------------------|--------|---------|-------------------|
| Day 0 vs. Day 7   | ****   | ns      | ns                |
| Day 0 vs. Day 14  | *      | ****    | ****              |
| Day 0 vs. Day 21  | **     | ****    | ****              |
| Day 0 vs. Day 28  | ns     | ****    | ****              |
| Day 7 vs. Day 14  | **     | ***     | ***               |
| Day 7 vs. Day 21  | ****   | **      | ****              |
| Day 7 vs. Day 28  | ***    | ***     | ****              |
| Day 14 vs. Day 21 | ns     | ns      | ns                |
| Day 14 vs. Day 28 | ns     | ns      | ns                |
| Day 21 vs. Day 28 | ns     | ns      | ns                |

\*P < 0.05, \*\*P < 0.01, \*\*\*P < 0.001 and \*\*\*\*P < 0.0001.

**Table S5.** Metabolites selected as candidates for estimation of bloodstain age

| No. | Matched name               | Mass    | Formula                                                         | CAS No. | HMDB ID     | KEGG ID |
|-----|----------------------------|---------|-----------------------------------------------------------------|---------|-------------|---------|
| 1   | Adenosine 5'-monophosphate | 347.063 | C <sub>10</sub> H <sub>14</sub> N <sub>5</sub> O <sub>7</sub> P | 61-19-8 | HMDB0000045 | C00020  |
| 2   | Choline                    | 104.108 | C <sub>5</sub> H <sub>14</sub> NO                               | 62-49-7 | HMDB0000097 | C00114  |
| 3   | Pyroglutamic acid          | 129.043 | C <sub>5</sub> H <sub>7</sub> NO <sub>3</sub>                   | 98-79-3 | HMDB0000267 | C01879  |

**Table S6.** Comparison of concentration of seven metabolites for each day

| Day combination   | 5'-AMP | Choline | Ergothioneine | Hypoxanthine | L-isoleucine | L-tryptophan | Pyroglutamic acid |
|-------------------|--------|---------|---------------|--------------|--------------|--------------|-------------------|
| Day 0 vs. Day 7   | ****   | ****    | **            | **           | ns           | ns           | ****              |
| Day 0 vs. Day 14  | **     | ****    | ns            | ****         | ***          | ***          | ns                |
| Day 0 vs. Day 21  | **     | ****    | ns            | ****         | **           | **           | *                 |
| Day 0 vs. Day 28  | ns     | ****    | ns            | ****         | **           | **           | ns                |
| Day 7 vs. Day 14  | ****   | *       | ns            | **           | ****         | ****         | ****              |
| Day 7 vs. Day 21  | ****   | ns      | ns            | **           | ****         | ****         | ****              |
| Day 7 vs. Day 28  | ****   | *       | *             | ***          | ****         | ****         | ****              |
| Day 14 vs. Day 21 | ns     | ns      | ns            | ns           | ns           | ns           | ns                |
| Day 14 vs. Day 28 | ns     | ns      | ns            | ns           | ns           | ns           | ns                |
| Day 21 vs. Day 28 | ns     | ns      | ns            | ns           | ns           | ns           | ns                |

\*P < 0.05, \*\*P < 0.01, \*\*\*P < 0.001 and \*\*\*\*P < 0.0001.
